# Supplementary material
Source: PubMed Central journal article supplement (PMC6696995)
Supplement: NIHMS1042047-supplement-Suppl_Material.pdf [file NIHMS1042047-supplement-Suppl_Material.pdf]

**KINETICS OF PLASMA BIOMARKERS OF INFLAMMATION AND  
LUNG INJURY IN SURGICAL PATIENTS WITH OR WITHOUT  
POSTOPERATIVE PULMONARY COMPLICATIONS**

ONLINE SUPPLEMENT

Ary Serpa Neto MD MSc PhD, Pedro PZA Campos MD, Sabine NT Hemmes MD, Lieuwe D Bos MD PhD, Thomas Bluth MD, Marion Ferner MD PhD, Andreas Güldner MD, Markus Hollmann MD PhD, Inmaculada India MD PhD, Thomas Kiss MD, Rita Laufenberg-Feldmann MD PhD, Juraj Sprung MD PhD, Demet Sulemanji MD PhD, Carmen Unzueta MD PhD, Marcos F Vidal Melo MD PhD, Toby N Weingarten MD PhD, Anita Maria Tuij-de Boer, Paolo Pelosi MD FERS, Marcelo Gama de Abreu MD PhD, Marcus J Schultz MD PhD;<sup>2</sup> for the PROVE Network Investigators

**eTable 1 – Definitions of postoperative pulmonary complications**

| PPCs                                     | Definition                                                                                                                                                                                                                                                                                            |
|------------------------------------------|-------------------------------------------------------------------------------------------------------------------------------------------------------------------------------------------------------------------------------------------------------------------------------------------------------|
| Unexpected need for supplementary oxygen | PaO <sub>2</sub> < 60 mmHg or SpO <sub>2</sub> < 90% in room air but responding to supplemental oxygen                                                                                                                                                                                                |
| Severe hypoxemia                         | Need for non-invasive or invasive mechanical ventilation or a PaO <sub>2</sub> < 60 mmHg or SpO <sub>2</sub> < 90% despite supplemental oxygen                                                                                                                                                        |
| Bronchospasm                             | Newly detected expiratory wheezing treated with bronchodilators                                                                                                                                                                                                                                       |
| Suspected pulmonary infection            | Patient receives antibiotics and meets at least one of the following criteria: new or changed sputum, new or changed lung opacities on chest X-ray when clinically indicated, tympanic temperature > 38.3°C, WBC count > 12,000/μl in the absence of other infectious focus                           |
| Pulmonary infiltrate                     | Chest X-ray demonstrating unilateral or bilateral infiltrates                                                                                                                                                                                                                                         |
| Aspiration pneumonitis                   | Respiratory failure after the inhalation of regurgitated gastric contents                                                                                                                                                                                                                             |
| ARDS                                     | According to AECC <sup>1</sup>                                                                                                                                                                                                                                                                        |
| Atelectasis                              | Suggested by lung opacification with shift of the mediastinum, hilum, or hemidiaphragm towards the affected area, and compensatory overinflation in the adjacent non-atelectatic lung                                                                                                                 |
| Pleural effusion                         | Chest X-ray demonstrating blunting of the costophrenic angle, loss of the sharp silhouette of the ipsilateral hemidiaphragm in upright position, evidence of displacement of adjacent anatomical structures or (in supine position) a hazy opacity in one hemi-thorax with preserved vascular shadows |
| Cardiopulmonary edema                    | Clinical signs of congestion, including dyspnea, edema, rales and jugular venous distention, with the chest X-ray demonstrating increase in vascular markings and diffuse alveolar interstitial infiltrates                                                                                           |
| Pneumothorax                             | Air in the pleural space with no vascular bed surrounding the visceral pleura                                                                                                                                                                                                                         |

PPCs: postoperative pulmonary complications; ARDS: acute respiratory distress syndrome; AECC: America-European Consensus Conference

1. Bernard GR, *et al.* Report of the American-European consensus conference on ARDS: definitions, mechanisms, relevant outcomes and clinical trial coordination. The Consensus Committee. *Intensive Care Med* 1994, 20:225–232.

**eTable 2 – Baseline characteristics of included patients according to randomization group and outcome group**

|                                           | High PEEP (n = 120) | Low PEEP (n = 122) | PPCs (n = 135)     | No PPC (n = 97)    |
|-------------------------------------------|---------------------|--------------------|--------------------|--------------------|
| <b>Demographic and clinical variables</b> |                     |                    |                    |                    |
| Men                                       | 70 / 120 (58.3)     | 71 / 122 (58.2)    | 81 / 135 (60.0)    | 52 / 97 (53.6)     |
| Age, years                                | 66.0 (56.2 – 73.0)  | 65.0 (55.0 – 73.2) | 68.0 (60.0 – 74.0) | 61.0 (52.0 – 71.5) |
| Body mass index, kg m <sup>-2</sup>       | 22.2 (19.3 – 24.6)  | 22.6 (19.4 – 24.5) | 22.6 (19.3 – 24.8) | 22.0 (19.2 – 24.3) |
| Weight, kg                                | 73.5 (64.0 – 85.0)  | 75.0 (64.0 – 85.0) | 77.0 (64.0 – 85.0) | 72.0 (63.5 – 82.0) |
| ARISCAT score*                            | 41.0 (38.0 – 42.0)  | 41.0 (38.0 – 48.0) | 41.0 (38.0 – 48.0) | 41.0 (38.0 – 44.0) |
| Intermediate (26 – 44)                    | 94 / 120 (78.3)     | 88 / 122 (72.1)    | 100 / 135 (74.1)   | 74 / 97 (76.3)     |
| High (> 44)                               | 26 / 120 (21.7)     | 34 / 122 (27.9)    | 35 / 135 (25.9)    | 23 / 97 (23.7)     |
| Smoking status                            |                     |                    |                    |                    |
| Never                                     | 68 / 120 (56.7)     | 63 / 122 (51.6)    | 71 / 135 (52.6)    | 55 / 97 (56.7)     |
| Former                                    | 23 / 120 (19.1)     | 23 / 122 (18.9)    | 29 / 135 (21.5)    | 16 / 97 (16.5)     |
| Current                                   | 29 / 120 (24.2)     | 36 / 122 (29.5)    | 35 / 135 (25.9)    | 26 / 97 (26.8)     |
| Alcohol status (past 2 weeks)             |                     |                    |                    |                    |
| None                                      | 64 / 120 (53.3)     | 72 / 122 (59.0)    | 77 / 135 (57.0)    | 52 / 97 (53.6)     |
| 0 – 2 units                               | 52 / 120 (43.3)     | 45 / 122 (36.9)    | 52 / 135 (38.5)    | 42 / 97 (43.3)     |
| > 2 units                                 | 4 / 120 (3.3)       | 5 / 122 (4.1)      | 6 / 135 (4.4)      | 3 / 97 (3.1)       |
| ASA physical status classification system |                     |                    |                    |                    |
| 1                                         | 2 / 119 (1.7)       | 10 / 122 (8.2)     | 2 / 135 (1.5)      | 8 / 97 (8.2)       |
| 2                                         | 62 / 119 (52.1)     | 61 / 122 (50.0)    | 68 / 135 (50.4)    | 51 / 97 (52.6)     |
| 3                                         | 55 / 119 (46.2)     | 50 / 122 (41.0)    | 64 / 135 (47.4)    | 38 / 97 (39.2)     |
| 4                                         | 0 / 119 (0.0)       | 1 / 122 (0.8)      | 1 / 135 (0.7)      | 0 / 97 (0.0)       |
| 5                                         | 0 / 119 (0.0)       | 0 / 122 (0.0)      | 0 / 135 (0.0)      | 0 / 97 (0.0)       |
| New York Heart Association classification |                     |                    |                    |                    |
| No cardiac failure                        | 96 / 120 (80.0)     | 97 / 122 (79.5)    | 103 / 135 (76.3)   | 82 / 97 (84.5)     |
| I                                         | 23 / 120 (19.2)     | 24 / 122 (19.7)    | 31 / 135 (23.0)    | 14 / 97 (14.4)     |
| II                                        | 1 / 120 (0.8)       | 1 / 122 (0.8)      | 1 / 135 (0.7)      | 1 / 97 (1.0)       |
| III                                       | 0 / 120 (0.0)       | 0 / 122 (0.0)      | 0 / 135 (0.0)      | 0 / 97 (0.0)       |
| IV                                        | 0 / 120 (0.0)       | 0 / 122 (0.0)      | 0 / 135 (0.0)      | 0 / 97 (0.0)       |
| Functional status                         |                     |                    |                    |                    |
| Independent                               | 118 / 120 (98.3)    | 120 / 122 (98.4)   | 132 / 135 (97.8)   | 96 / 97 (99.0)     |
| Partially dependent                       | 2 / 120 (1.7)       | 2 / 122 (1.6)      | 3 / 135 (2.2)      | 1 / 97 (1.0)       |
| Totally dependent                         | 0 / 120 (0.0)       | 0 / 122 (0.0)      | 0 / 135 (0.0)      | 0 / 97 (0.0)       |

|                                                     |                       |                       |                       |                       |
|-----------------------------------------------------|-----------------------|-----------------------|-----------------------|-----------------------|
| History of active cancer                            | 62 / 120 (51.7)       | 62 / 122 (50.8)       | 75 / 135 (55.6)       | 45 / 97 (46.4)        |
| Chronic kidney failure                              | 6 / 120 (5.0)         | 6 / 122 (4.9)         | 7 / 135 (5.2)         | 5 / 97 (5.2)          |
| Chronic obstructive pulmonary disease               | 11 / 120 (9.2)        | 5 / 122 (4.1)         | 11 / 135 (8.1)        | 4 / 97 (4.1)          |
| Inhalation therapy**                                | 7 / 120 (5.8)         | 3 / 122 (2.5)         | 8 / 135 (5.9)         | 2 / 97 (2.1)          |
| Systemic steroids                                   | 5 / 120 (4.2)         | 1 / 122 (0.8)         | 4 / 135 (3.0)         | 1 / 97 (1.0)          |
| Diabetes mellitus                                   | 22 / 120 (18.3)       | 28 / 122 (23.0)       | 30 / 135 (22.2)       | 18 / 97 (18.6)        |
| Oral medication                                     | 14 / 120 (11.7)       | 11 / 122 (9.0)        | 16 / 135 (11.9)       | 7 / 97 (7.2)          |
| Insulin                                             | 6 / 120 (5.0)         | 13 / 122 (10.7)       | 10 / 135 (7.4)        | 9 / 97 (9.3)          |
| Systemic steroids                                   | 4 / 120 (3.3)         | 3 / 122 (2.5)         | 6 / 135 (4.4)         | 0 / 97 (0.0)          |
| Statins                                             | 29 / 120 (24.2)       | 29 / 122 (23.8)       | 38 / 135 (28.1)       | 18 / 97 (18.6)        |
| Preoperative transfusion                            | 1 / 120 (0.8)         | 0 / 122 (0.0)         | 1 / 135 (0.7)         | 0 / 97 (0.0)          |
| <b>Preoperative tests</b>                           |                       |                       |                       |                       |
| Hemoglobin, g dl <sup>-1</sup>                      | 13.5 (12.2 – 14.5)    | 13.4 (12.2 – 14.6)    | 13.2 (12.1 – 14.4)    | 13.7 (12.4 – 14.6)    |
| Creatinine, mg dl <sup>-1</sup>                     | 0.8 (0.7 – 1.0)       | 0.8 (0.7 – 1.0)       | 0.8 (0.7 – 1.0)       | 0.8 (0.7 – 1.0)       |
| Urea, mg dl <sup>-1</sup>                           | 25.9 (16.0 – 36.9)    | 23.2 (16.0 – 35.1)    | 25.3 (16.0 – 36.7)    | 25.3 (16.6 – 36.3)    |
| White blood cells, x10 <sup>9</sup> cells per litre | 7.3 (5.7 – 8.9)       | 6.7 (5.7 – 8.5)       | 7.0 (5.7 – 9.0)       | 6.8 (5.7 – 8.4)       |
| Oxyhemoglobin saturation, %***                      | 97.0 (96.0 – 98.0)    | 97.0 (96.0 – 98.2)    | 97.0 (96.0 – 98.0)    | 98.0 (96.5 – 99.0)    |
| Abnormalities on chest radiography                  | 7 / 78 (9.0)          | 8 / 90 (8.9)          | 10 / 91 (11.0)        | 4 / 72 (5.6)          |
| <b>Perioperative variables</b>                      |                       |                       |                       |                       |
| Duration of anesthesia, minutes                     | 300.0 (240.0 – 400.0) | 275.0 (210.0 – 360.0) | 325.0 (255.0 – 417.0) | 245.0 (193.5 – 305.0) |
| Duration of surgery, minutes <sup>†</sup>           | 240.0 (165.0 – 330.0) | 215.0 (150.0 – 300.0) | 259.0 (190.0 – 355.0) | 188.0 (140.0 – 237.5) |
| Surgical procedure                                  |                       |                       |                       |                       |
| Gastric                                             | 4 / 120 (3.3)         | 7 / 122 (5.7)         | 8 / 135 (5.9)         | 2 / 97 (2.1)          |
| Pancreatic                                          | 31 / 120 (25.8)       | 35 / 122 (28.7)       | 36 / 135 (26.7)       | 29 / 97 (29.9)        |
| Biliary                                             | 9 / 120 (7.5)         | 3 / 122 (2.5)         | 8 / 135 (5.9)         | 3 / 97 (3.1)          |
| Liver                                               | 15 / 120 (12.5)       | 6 / 122 (4.9)         | 14 / 135 (10.4)       | 6 / 97 (6.2)          |
| Colonic                                             | 13 / 120 (10.8)       | 10 / 122 (8.2)        | 13 / 135 (9.6)        | 10 / 97 (10.3)        |
| Rectal                                              | 11 / 120 (9.2)        | 10 / 122 (8.2)        | 10 / 135 (7.4)        | 11 / 97 (11.3)        |
| Bladder                                             | 2 / 120 (1.7)         | 3 / 122 (2.5)         | 5 / 135 (3.7)         | 0 / 97 (0.0)          |
| Kidney                                              | 5 / 120 (4.2)         | 6 / 122 (4.9)         | 7 / 135 (5.2)         | 3 / 97 (3.1)          |
| Vascular                                            | 11 / 120 (9.2)        | 13 / 122 (10.7)       | 12 / 135 (8.9)        | 9 / 97 (9.3)          |
| Other                                               | 19 / 120 (15.8)       | 29 / 122 (23.8)       | 22 / 135 (16.3)       | 24 / 97 (24.7)        |
| Antibiotic prophylaxis                              | 113 / 114 (99.1)      | 116 / 117 (99.1)      | 132 / 133 (99.2)      | 95 / 96 (99.0)        |
| Type of anesthesia                                  |                       |                       |                       |                       |
| Total intravenous                                   | 16 / 117 (13.7)       | 15 / 118 (12.7)       | 16 / 135 (11.9)       | 14 / 97 (14.4)        |
| Mixed (volatile and intravenous)                    | 101 / 117 (86.3)      | 103 / 118 (87.3)      | 119 / 135 (88.1)      | 83 / 97 (85.6)        |

|          |                 |                 |                 |                |
|----------|-----------------|-----------------|-----------------|----------------|
| Epidural |                 |                 |                 |                |
| Thoracic | 64 / 111 (57.7) | 73 / 115 (63.5) | 85 / 130 (65.4) | 50 / 94 (53.2) |
| Lumbar   | 1 / 111 (0.9)   | 0 / 115 (0.0)   | 0 / 130 (0.0)   | 1 / 94 (1.1)   |

---

*PPCs, postoperative pulmonary complications; PEEP, positive end-expiratory pressure; ASA, American Society of Anesthesiology*

Data are median (interquartile range), or number / total number of patients (%)

\* ARISCAT score measures risk of postoperative pulmonary complications

\*\* inhaled bronchodilators, steroids or both

\*\*\* measured by pulse oximetry

¶ defined as the time between skin incision and closure of incision

**eTable 3 – Intraoperative characteristics of included patients**

|                                                           | High PEEP<br>(n = 120) | Low PEEP<br>(n = 122) |
|-----------------------------------------------------------|------------------------|-----------------------|
| Tidal volumes, ml kg <sup>-1</sup> PBW*                   | 7.9 (7.6 – 8.1)        | 8.0 (7.8 – 8.1)       |
| After 1 hour                                              | 7.9 (7.7 – 8.2)        | 7.9 (7.7 – 8.1)       |
| Before extubation                                         | 7.9 (7.6 – 8.1)        | 8.0 (7.8 – 8.3)       |
| PEEP, cmH <sub>2</sub> O*                                 | 12.0 (12.0 – 12.0)     | 2.0 (1.0 – 2.0)       |
| After 1 hour                                              | 12.0 (12.0 – 12.0)     | 2.0 (0.0 – 2.0)       |
| Before extubation                                         | 12.0 (12.0 – 12.0)     | 2.0 (1.0 – 2.0)       |
| Peak pressure, cmH <sub>2</sub> O*                        | 21.7 (20.0 – 23.1)     | 15.5 (13.7 – 18.0)    |
| After 1 hour                                              | 21.0 (19.5 – 23.5)     | 15.0 (13.0 – 18.0)    |
| Before extubation                                         | 22.0 (20.0 – 24.0)     | 16.0 (14.0 – 19.0)    |
| Dynamic compliance, ml cmH <sub>2</sub> O <sup>-1</sup> * | 50.0 (40.5 – 59.4)     | 37.5 (28.3 – 45.6)    |
| After 1 hour                                              | 50.0 (40.0 – 67.1)     | 38.4 (28.6 – 49.1)    |
| Before extubation                                         | 50.0 (40.5 – 59.4)     | 36.7 (28.1 – 42.5)    |
| Respiratory rate, breaths minute <sup>-1</sup> *          | 12.0 (10.0 – 13.0)     | 12.0 (10.0 – 12.0)    |
| After 1 hour                                              | 11.0 (10.0 – 12.0)     | 12.0 (10.0 – 12.0)    |
| Before extubation                                         | 12.0 (10.0 – 14.0)     | 11.0 (10.0 – 12.0)    |
| Minute ventilation, l min <sup>-1</sup> *                 | 5.9 (5.1 – 6.7)        | 5.7 (4.9 – 6.6)       |
| After 1 hour                                              | 5.7 (4.9 – 6.3)        | 5.5 (4.7 – 6.2)       |
| Before extubation                                         | 6.1 (4.8 – 7.3)        | 5.6 (4.8 – 6.6)       |
| Inspired fraction of oxygen*                              | 0.43 (0.40 – 0.49)     | 0.43 (0.40 – 0.50)    |
| After 1 hour                                              | 0.42 (0.40 – 0.50)     | 0.44 (0.40 – 0.50)    |
| Before extubation                                         | 0.42 (0.40 – 0.47)     | 0.43 (0.40 – 0.48)    |
| Oxyhemoglobin saturation, %*,**                           | 100.0 (99.0 – 100.0)   | 100.0 (99.0 – 100.0)  |
| After 1 hour                                              | 100.0 (99.0 – 100.0)   | 99.0 (98.2 – 100.0)   |
| Before extubation                                         | 100.0 (99.0 – 100.0)   | 100.0 (98.0 – 100.0)  |
| P <sub>ET</sub> CO <sub>2</sub> , mmHg*                   | 34.0 (32.0 – 36.0)     | 33.7 (31.6 – 35.2)    |
| After 1 hour                                              | 35.2 (33.0 – 37.0)     | 34.0 (31.5 – 35.2)    |
| Before extubation                                         | 35.2 (33.0 – 37.4)     | 35.2 (33.4 – 37.0)    |
| Recruitment maneuver                                      |                        |                       |
| After intubation                                          | 113 / 116 (97.4)       | 3 / 117 (2.6)         |
| Before extubation                                         | 101 / 117 (86.3)       | 1 / 118 (0.8)         |

PEEP, positive end-expiratory pressure; PBW, predicted body weight; P<sub>ET</sub>CO<sub>2</sub>, end-tidal partial pressure of carbon dioxide

Data are median (interquartile range), or number / total number of patients (%). PBW calculated as 50 + 0.91 × (height [cm] – 152.4) for men and 45.5 + 0.91 × (height [cm] – 152.4) for women. Dynamic compliance calculated as tidal volume / (peak pressure – PEEP)

\* Averaged during surgery

\*\* Measured by pulse oximetry

**eTable 4 – Incidence of PPCs**

|                                              | <b>High PEEP<br/>(n = 120)</b> | <b>Low PEEP<br/>(n = 122)</b> |
|----------------------------------------------|--------------------------------|-------------------------------|
| <b>Postoperative pulmonary complications</b> |                                |                               |
| Total                                        | 76 / 116 (65.5)                | 59 / 116 (50.9)               |
| Total (excluding hypoxemia)                  | 52 / 116 (44.8)                | 48 / 117 (41.0)               |
| Hypoxemia                                    | 60 / 116 (51.7)                | 44 / 117 (37.6)               |
| Severe hypoxemia                             | 11 / 116 (9.5)                 | 10 / 117 (8.5)                |
| Bronchospasm                                 | 6 / 116 (5.2)                  | 8 / 117 (6.8)                 |
| Suspected pulmonary infection                | 25 / 116 (21.6)                | 19 / 117 (16.2)               |
| Pulmonary infiltrate                         | 10 / 112 (8.9)                 | 8 / 112 (7.1)                 |
| Aspiration pneumonitis                       | 0 / 116 (0.0)                  | 3 / 117 (2.6)                 |
| Acute respiratory distress syndrome          | 1 / 111 (0.9)                  | 2 / 112 (1.8)                 |
| Atelectasis                                  | 11 / 111 (9.9)                 | 14 / 112 (12.5)               |
| Pleural effusion                             | 32 / 111 (28.8)                | 32 / 112 (28.6)               |
| Cardiogenic pulmonary edema                  | 7 / 112 (6.3)                  | 8 / 114 (7.0)                 |
| Pneumothorax                                 | 2 / 110 (1.8)                  | 0 / 112 (0.0)                 |

*PPCs, postoperative pulmonary complications; PEEP, positive end-expiratory pressure*

Data are median (interquartile range), or number / total number of patients (%). Complications were counted as soon as an event occurred

**eTable 5 – Receiver operator characteristic–area under curve for development of PPCs**

|                 | <b>AUC (95% CI)</b>   |
|-----------------|-----------------------|
| Absolute value  |                       |
| TNF- $\alpha$   | 0.592 (0.515 – 0.669) |
| IL-6            | 0.700 (0.630 – 0.769) |
| SP-D            | 0.539 (0.462 – 0.615) |
| CC-16           | 0.580 (0.503 – 0.657) |
| Relative change |                       |
| TNF- $\alpha$   | 0.604 (0.527 – 0.681) |
| IL-6            | 0.652 (0.577 – 0.726) |
| SP-D            | 0.585 (0.509 – 0.661) |
| CC-16           | 0.526 (0.450 – 0.603) |

*AUC, area under the curve; CI, confidence interval; PPCs, postoperative pulmonary complications; TNF, tumor necrosis factor; IL, interleukin; SP-D, surfactant protein D; CC-16, clara cell protein.*

Absolute value directly after surgery

% change: (postoperative *divided by* preoperative)



**eTable 6 – Analyses from the false discovery rate using the Benjamini-Hochberg procedure with a false discovery rate of 0.2 for results of Figure 3**

| Variable              | <i>P</i> value | Benjamini-Hochberg<br><i>P</i> value | Significant* |
|-----------------------|----------------|--------------------------------------|--------------|
| CC-16 (Day 1)         | 0.009          | 0.1260                               | Yes          |
| sRAGE (Day 1)         | 0.098          | 0.5203                               | No           |
| IL-6 (Day 1)          | 0.153          | 0.5203                               | No           |
| SP-D (Day 1)          | 0.158          | 0.5203                               | No           |
| IL-8 (Day 1)          | 0.213          | 0.5203                               | No           |
| CC-16 (Day 5)         | 0.223          | 0.5203                               | No           |
| TNF- $\alpha$ (Day 1) | 0.331          | 0.6172                               | No           |
| sRAGE (Day 5)         | 0.389          | 0.6172                               | No           |
| SP-D (Day 5)          | 0.440          | 0.6172                               | No           |
| IL-6 (Day 5)          | 0.466          | 0.6172                               | No           |
| TNF- $\alpha$ (Day 5) | 0.485          | 0.6172                               | No           |
| IL-8 (Day 5)          | 0.574          | 0.6696                               | No           |
| KL6 (Day 5)           | 0.684          | 0.7366                               | No           |
| KL6 (Day 5)           | 0.848          | 0.8480                               | No           |

*TNF*, tumor necrosis factor; *IL*, interleukin; *sRAGE*, soluble receptor for advanced glycation end-products; *SP-D*, surfactant protein D; *CC-16*, Clara cell protein; *KL6*, Krebs von den Lungen-6.

\*: significance according to the false discovery rate of 0.2

**eTable 7 – Plasma level of biomarkers of inflammation and lung injury according to diagnosis of severe PPCs**

|                      | TNF- $\alpha$ (pg ml <sup>-1</sup> ) | IL-6 (pg ml <sup>-1</sup> )   | IL-8 (pg ml <sup>-1</sup> ) | sRAGE ( $\mu$ g ml <sup>-1</sup> ) <sup>1)</sup> | SP-D ( $\mu$ g ml <sup>-1</sup> ) | CC-16 ( $\mu$ g ml <sup>-1</sup> ) | KL6 (units ml <sup>-1</sup> ) |
|----------------------|--------------------------------------|-------------------------------|-----------------------------|--------------------------------------------------|-----------------------------------|------------------------------------|-------------------------------|
| <b>Severe PPCs</b>   |                                      |                               |                             |                                                  |                                   |                                    |                               |
| Preoperative         | 8.6 (3.9 – 11.1)                     | 3.0 (1.9 – 4.9)               | 6.6 (3.9 – 9.5)             | 1.8 (1.4 – 2.4)                                  | 8.8 (4.6 – 15.3)                  | 14.3 (7.7 – 22.7)                  | 17.3 (9.9 – 26.3)             |
| Postoperative        | 8.5 (3.5 – 11.8)                     | 95.4 (37.5 –                  | 14.9 (8.0 – 32.6)           | 1.8 (1.4 – 2.5)                                  | 5.3 (3.4 – 9.8)                   | 16.7 (10.1 – 26.3)                 | 13.0 (7.3 – 20.8)             |
| Postoperative day 5  | 8.5 (4.5 – 11.6)                     | 205.1)                        | 9.1 (5.6 – 13.1)            | 1.9 (1.4 – 2.5)                                  | 5.9 (3.5 – 8.8)                   | 10.3 (6.9 – 17.2)                  | 12.4 (6.3 – 18.3)             |
| <b>P-value*</b>      | 0.025                                | 11.0 (5.8 – 21.4)<br>< 0.001  | < 0.001                     | 0.713                                            | < 0.001                           | < 0.001                            | < 0.001                       |
| <b>No Severe PPC</b> |                                      |                               |                             |                                                  |                                   |                                    |                               |
| Preoperative         | 9.0 (5.5 – 11.5)                     | 3.8 (2.6 – 6.5)               | 7.1 (5.0 – 11.3)            | 2.1 (1.7 – 2.4)                                  | 9.7 (5.3 – 1.7)                   | 16.3 (11.6 – 23.9)                 | 18.8 (13.3 – 27.4)            |
| Postoperative        | 9.0 (5.1 – 13.3)                     | 153.7 (71.7 –                 | 21.4 (12.4 – 45.4)          | 2.1 (1.5 – 2.5)                                  | 6.3 (3.2 – 10.5)                  | 18.4 (13.5 – 30.2)                 | 14.2 (8.7 – 19.0)             |
| Postoperative day 5  | 10.2 (5.5 – 12.9)                    | 335.7)                        | 10.7 (7.7 – 20.9)           | 2.0 (1.5 – 2.7)                                  | 6.7 (4.3 – 13.0)                  | 14.1 (8.8 – 21.7)                  | 13.4 (7.4 – 19.0)             |
| <b>P-value*</b>      | 0.044                                | 19.0 (10.6 – 50.7)<br>< 0.001 | < 0.001                     | 0.798                                            | < 0.001                           | < 0.001                            | < 0.001                       |
| <b>P-value**</b>     | 0.233                                | 0.032                         | 0.719                       | 0.715                                            | 0.407                             | 0.017                              | 0.504                         |

PPCs, postoperative pulmonary complications; TNF, tumor necrosis factor; IL, interleukin; sRAGE, soluble receptor for advanced glycation end-products; SP-D, surfactant protein D; CC-16, clara cell protein; KL-6, Krebs von den Lungen-6.

Values are medians (interquartile range)

\*, value is for comparison over time (postoperative vs. preoperative and postoperative day 5 vs. postoperative [repeated contrast])

\*\*, comparison between groups over time (PPCs vs. no PPC and High PEEP vs. Low PEEP)

**eTable 8 – Plasma level of biomarkers of inflammation and lung injury according to level of PEEP and development of PPC**

|                             | TNF- $\alpha$ (pg ml <sup>-1</sup> ) | IL-6 (pg ml <sup>-1</sup> )   | IL-8 (pg ml <sup>-1</sup> ) | sRAGE ( $\mu$ g ml <sup>-1</sup> ) <sup>1)</sup> | SP-D ( $\mu$ g ml <sup>-1</sup> ) | CC-16 ( $\mu$ g ml <sup>-1</sup> ) | KL6 (units ml <sup>-1</sup> ) |
|-----------------------------|--------------------------------------|-------------------------------|-----------------------------|--------------------------------------------------|-----------------------------------|------------------------------------|-------------------------------|
| <b>High PEEP and PPC</b>    |                                      |                               |                             |                                                  |                                   |                                    |                               |
| Preoperative                | 8.8 (5.0 – 11.3)                     | 3.3 (2.3 – 5.0)               | 7.2 (4.7 – 9.5)             | 2.0 (1.7 – 2.4)                                  | 10.5 (6.6 – 19.4)                 | 15.0 (9.8 – 21.9)                  | 17.8 (12.2 – 25.5)            |
| Postoperative               | 9.7 (5.1 – 13.6)                     | 153.7 (82.9 –                 | 23.1 (11.8 – 47.9)          | 2.2 (1.6 – 2.8)                                  | 5.9 (3.7 – 11.8)                  | 18.1 (12.2 – 30.4)                 | 12.9 (9.1 – 17.6)             |
| Postoperative day 5         | 10.2 (5.8 – 12.7)                    | 344.8)                        | 10.6 (7.2 – 20.0)           | 2.2 (1.7 – 2.8)                                  | 6.9 (4.3 – 13.3)                  | 13.9 (8.0 – 23.2)                  | 12.7 (7.1 – 17.3)             |
| <b>P-value*</b>             | 0.006                                | 16.9 (10.3 – 53.7)<br>< 0.001 | < 0.001                     | 0.222                                            | < 0.001                           | < 0.001                            | < 0.001                       |
| <b>High PEEP and No PPC</b> |                                      |                               |                             |                                                  |                                   |                                    |                               |
| Preoperative                | 5.9 (3.1 – 9.9)                      | 2.6 (2.0 – 4.1)               | 6.8 (4.5 – 12.8)            | 1.7 (1.2 – 2.2)                                  | 7.6 (3.9 – 16.7)                  | 17.0 (6.7 – 24.6)                  | 17.4 (9.1 – 31.0)             |
| Postoperative               | 6.2 (3.0 – 10.5)                     | 61.5 (29.3 –                  | 14.4 (8.7 – 29.0)           | 1.9 (1.3 – 2.4)                                  | 4.7 (2.2 – 9.0)                   | 17.2 (9.7 – 28.0)                  | 13.3 (7.7 – 22.5)             |
| Postoperative day 5         | 6.4 (4.3 – 10.9)                     | 166.0)                        | 8.3 (4.3 – 13.4)            | 1.7 (1.3 – 2.5)                                  | 5.4 (3.4 – 8.4)                   | 9.7 (6.6 – 16.9)                   | 12.7 (6.0 – 20.6)             |
| <b>P-value*</b>             | 0.787                                | 7.6 (5.4 – 15.4)<br>< 0.001   | < 0.001                     | 0.376                                            | < 0.001                           | < 0.001                            | < 0.001                       |
| <b>Low PEEP and PPC</b>     |                                      |                               |                             |                                                  |                                   |                                    |                               |
| Preoperative                | 9.1 (5.7 – 11.5)                     | 4.5 (2.4 – 6.6)               | 7.1 (5.4 – 12.9)            | 1.9 (1.5 – 2.5)                                  | 9.0 (4.5 – 15.6)                  | 16.3 (12.1 – 24.5)                 | 19.9 (11.7 – 29.6)            |
| Postoperative               | 8.5 (5.4 – 12.9)                     | 147.3 (71.7 –                 | 19.4 (13.7 – 43.8)          | 2.0 (1.4 – 2.4)                                  | 5.6 (2.8 – 10.1)                  | 19.1 (13.1 – 26.5)                 | 14.1 (7.9 – 20.0)             |
| Postoperative day 5         | 9.9 (5.5 – 13.0)                     | 326.6)                        | 10.5 (7.7 – 14.5)           | 1.9 (1.4 – 2.5)                                  | 5.9 (4.2 – 12.7)                  | 13.8 (8.8 – 21.5)                  | 13.2 (7.4 – 17.4)             |
| <b>P-value*</b>             | 0.060                                | 19.0 (9.4 – 45.2)<br>< 0.001  | < 0.001                     | 0.989                                            | < 0.001                           | < 0.001                            | < 0.001                       |
| <b>Low PEEP and No PPC</b>  |                                      |                               |                             |                                                  |                                   |                                    |                               |
| Preoperative                | 8.1 (3.8 – 11.6)                     | 3.3 (1.6 – 5.0)               | 6.0 (3.1 – 9.4)             | 1.8 (1.4 – 2.4)                                  | 8.4 (4.9 – 14.2)                  | 13.0 (7.7 – 22.1)                  | 18.6 (9.7 – 27.7)             |
| Postoperative               | 8.5 (3.5 – 11.6)                     | 64.3 (32.9 –                  | 12.7 (7.1 – 23.9)           | 1.7 (1.4 – 2.1)                                  | 5.7 (3.6 – 10.4)                  | 16.2 (8.8 – 24.2)                  | 13.7 (6.8 – 23.5)             |
| Postoperative day 5         | 7.5 (3.7 – 12.0)                     | 144.4)                        | 8.0 (4.2 – 12.1)            | 1.8 (1.3 – 2.2)                                  | 5.9 (3.1 – 9.0)                   | 10.3 (6.6 – 17.3)                  | 12.8 (5.6 – 21.9)             |
| <b>P-value*</b>             | 0.402                                | 10.2 (6.5 – 18.8)<br>< 0.001  | < 0.001                     | 0.845                                            | < 0.001                           | < 0.001                            | < 0.001                       |
| <b>P-value**</b>            | 0.308                                | 0.085                         | 0.690                       | 0.512                                            | 0.121                             | 0.050                              | 0.721                         |

PPCs, postoperative pulmonary complications; TNF, tumor necrosis factor; IL, interleukin; sRAGE, soluble receptor for advanced glycation end-products; SP-D, surfactant protein D; CC-16, clara cell protein; KL-6, Krebs von den Lungen-6.

Values are medians (interquartile range)

\*, value is for comparison over time (postoperative vs. preoperative and postoperative day 5 vs. postoperative [repeated contrast])

\*\*, comparison between groups over time (High PEEP and PPC vs. High PEEP and No PPC vs. Low PEEP and PPC vs. Low PEEP and No PPC)

**eTable 9** – Relative changes in plasma level of biomarkers of inflammation and lung injury according to level of PEEP and development of PPC

|               | High PEEP and PPC   | High PEEP and No PPC | Low PEEP and PPC   | Low PEEP and No PPC | P value |
|---------------|---------------------|----------------------|--------------------|---------------------|---------|
| Day 01        |                     |                      |                    |                     |         |
| TNF- $\alpha$ | 1.1 (1.0 – 1.2)     | 0.9 (0.7 – 1.0)      | 1.0 (0.9 – 1.1)    | 1.0 (0.9 – 1.1)     | 0.001   |
| IL-6          | 47.9 (20.2 – 134.8) | 21.7 (14.1 – 38.4)   | 43.4 (14.3 – 96.6) | 20.4 (7.8 – 58.9)   | 0.001   |
| IL-8          | 3.2 (1.7 – 5.6)     | 2.1 (1.4 – 3.6)      | 2.6 (1.7 – 7.3)    | 2.0 (1.2 – 3.7)     | 0.019   |
| sRAGE         | 1.0 (0.9 – 1.2)     | 0.9 (0.8 – 1.2)      | 0.9 (0.8 – 1.1)    | 0.9 (0.8 – 1.1)     | 0.415   |
| SP-D          | 0.6 (0.5 – 0.7)     | 0.7 (0.5 – 0.8)      | 0.6 (0.5 – 0.9)    | 0.7 (0.6 – 0.9)     | 0.098   |
| CC-16         | 1.2 (1.0 – 1.5)     | 1.2 (1.0 – 1.6)      | 1.1 (0.9 – 1.5)    | 1.1 (0.9 – 1.3)     | 0.109   |
| KL6           | 0.72 (0.6 – 0.8)    | 0.7 (0.6 – 0.9)      | 0.7 (0.5 – 0.9)    | 0.7 (0.6 – 0.9)     | 0.261   |
| Day 05        |                     |                      |                    |                     |         |
| TNF- $\alpha$ | 1.1 (1.0 – 1.4)     | 1.1 (0.9 – 1.2)      | 1.1 (1.0 – 1.4)    | 1.0 (0.9 – 1.1)     | 0.117   |
| IL-6          | 4.9 (2.8 – 15.8)    | 3.0 (2.0 – 4.7)      | 4.5 (2.2 – 9.6)    | 3.5 (1.7 – 6.1)     | 0.010   |
| IL-8          | 1.6 (1.1 – 2.4)     | 1.3 (0.7 – 1.8)      | 1.4 (0.9 – 2.0)    | 1.5 (0.9 – 2.1)     | 0.279   |
| sRAGE         | 1.1 (0.8 – 1.3)     | 1.0 (0.7 – 1.2)      | 1.0 (0.8 – 1.3)    | 1.0 (0.8 – 1.2)     | 0.354   |
| SP-D          | 0.6 (0.5 – 1.0)     | 0.5 (0.4 – 0.9)      | 0.8 (0.5 – 1.1)    | 0.6 (0.5 – 0.8)     | 0.246   |
| CC-16         | 0.9 (0.8 – 1.2)     | 0.8 (0.5 – 1.0)      | 0.8 (0.6 – 1.0)    | 0.8 (0.6 – 1.0)     | 0.045   |
| KL6           | 0.7 (0.5 – 0.8)     | 0.7 (0.5 – 0.8)      | 0.6 (0.5 – 0.8)    | 0.7 (0.6 – 0.9)     | 0.610   |

PPCs, postoperative pulmonary complications; TNF, tumor necrosis factor; IL, interleukin; sRAGE, soluble receptor for advanced glycation end-products; SP-D, surfactant protein D; CC-16, clara cell protein; KL-6, Krebs von den Lungen-6.

Values are medians (interquartile range)

\*, value is for comparison over time (postoperative vs. preoperative and postoperative day 5 vs. postoperative [repeated contrast])

\*\*, comparison between groups over time (High PEEP and PPC vs. High PEEP and No PPC vs. Low PEEP and PPC vs. Low PEEP and No PPC)

**eTable 10 – Analyses from the false discovery rate using the Benjamini-Hochberg procedure with a false discovery rate of 0.2 for results of eTable 8**

| Variable              | <i>p</i> value | Benjamini-Hochberg<br><i>p</i> value | Significant* |
|-----------------------|----------------|--------------------------------------|--------------|
| TNF- $\alpha$ (Day 1) | 0.00068        | 0.0076                               | Yes          |
| IL-6 (Day 1)          | 0.00109        | 0.0076                               | Yes          |
| IL-6 (Day 5)          | 0.01000        | 0.0466                               | Yes          |
| IL-8 (Day 1)          | 0.01900        | 0.0665                               | Yes          |
| CC-16 (Day 5)         | 0.04500        | 0.1260                               | Yes          |
| SP-D (Day 1)          | 0.09800        | 0.2047                               | No           |
| CC-16 (Day 1)         | 0.10900        | 0.2047                               | No           |
| TNF- $\alpha$ (Day 5) | 0.11700        | 0.2047                               | No           |
| SP-D (Day 5)          | 0.24600        | 0.3550                               | No           |
| KL6 (Day 1)           | 0.26100        | 0.3550                               | No           |
| IL-8 (Day 5)          | 0.27900        | 0.3500                               | No           |
| sRAGE (Day 5)         | 0.35400        | 0.4130                               | No           |
| sRAGE (Day 1)         | 0.41500        | 0.4469                               | No           |
| KL6 (Day 5)           | 0.6100         | 0.6100                               | No           |

*TNF*, tumor necrosis factor; *IL*, interleukin; *sRAGE*, soluble receptor for advanced glycation end-products; *SP-D*, surfactant protein D; *CC-16*, Clara cell protein; *KL6*, Krebs von den Lungen-6.

\*: significance according to the false discovery rate of 0.2

eFigure 1 – Flowchart of the trial

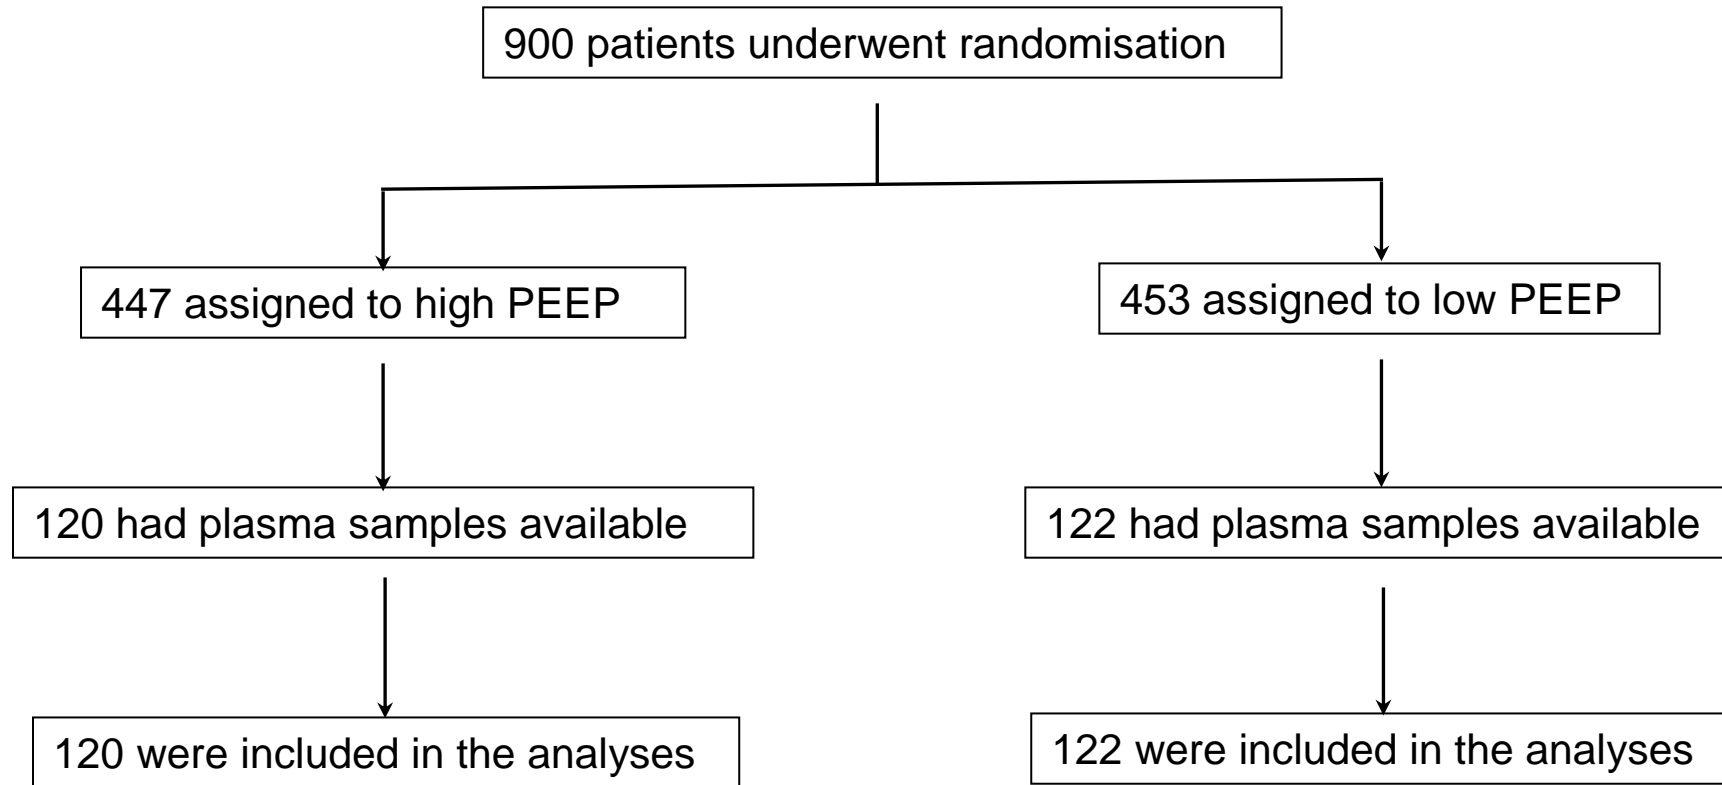

**eFigure 2 – Relative changes in plasma levels of biomarkers in patients with (closed circles) and patients without PPC, restricted to severe PPCs (i.e., excluding unexpected need for supplementary oxygen) (open circles)**

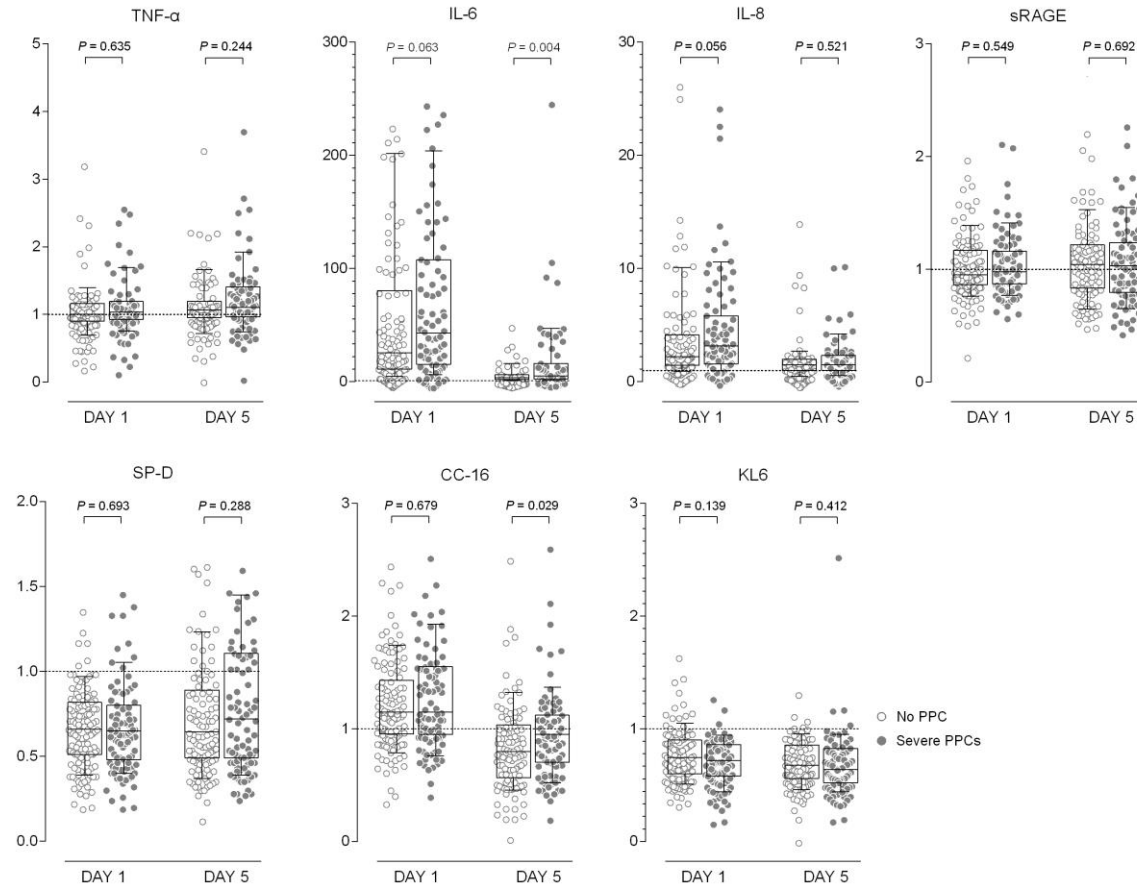

Analysis of relative change of plasma levels of biomarkers of inflammation according to development (gray circles) or not (white circles) of severe postoperative pulmonary complications. *Line represents the median, the box the interquartile range and the bars the 10% and 90% range.*
